## Erratum

### *An 'Extended But-For' Test for the Causal Relation in the Law of Obligations*

Jane Stapleton

(*Oxford Journal of Legal Studies*, Vol. 35, No. 4 (2015),  
pp. 697–726; doi: 10.1093/ojls/gqv005)

---

There was a typo on page 706, lines 6–9. It should have read:

In other words, the hypothetical no-breach world is a *counterfactual* one because it is specified by reversing the precise factor which the complainant alleges was the wrongful aspect of the defendant's conduct.

The publisher apologizes for the error.
